# Supplementary material
Source: MDPI journal article supplement (https://www.mdpi.com/2624-781X/2/2/7)
Supplement: s1 [file s1]

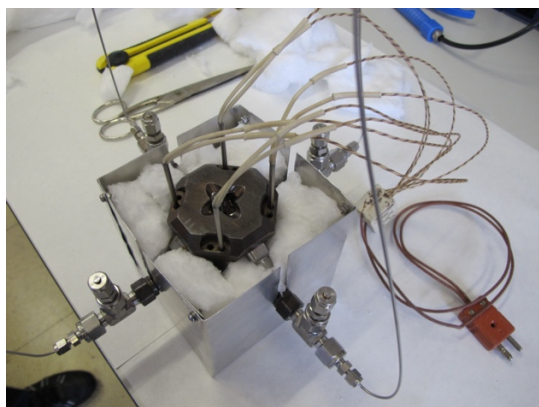

a)

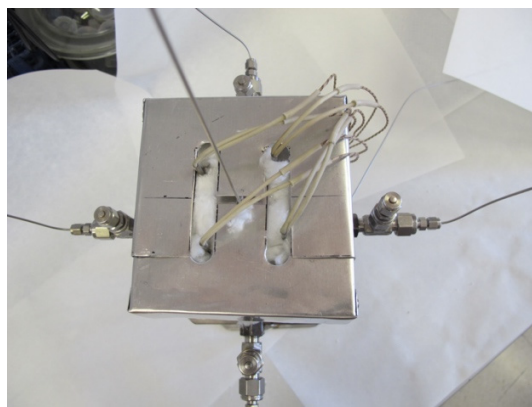

b)

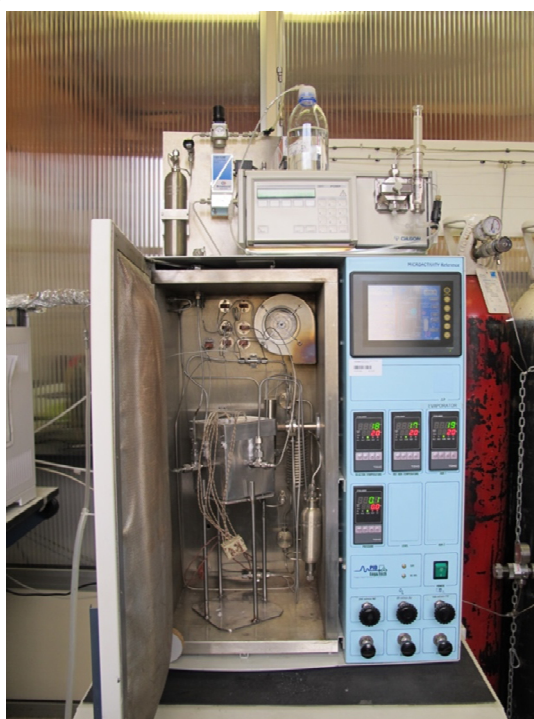

c)

Figure S1. a) Microreactor during insulation installation. b) Microreactor with insulating shell, heater cartridges and six thermocouples. c) Microreactor with the insulating shell and fluid connections installed in the hot box of the commercial mother reactor.
